# Supplementary material
Source: publisher figshare collection journal article supplement (https://frontiersin.figshare.com/ndownloader/files/18108830)
Supplement: Supplementary file [file 18108830]

## *Supplementary Material*

### 1 Supplementary Figures

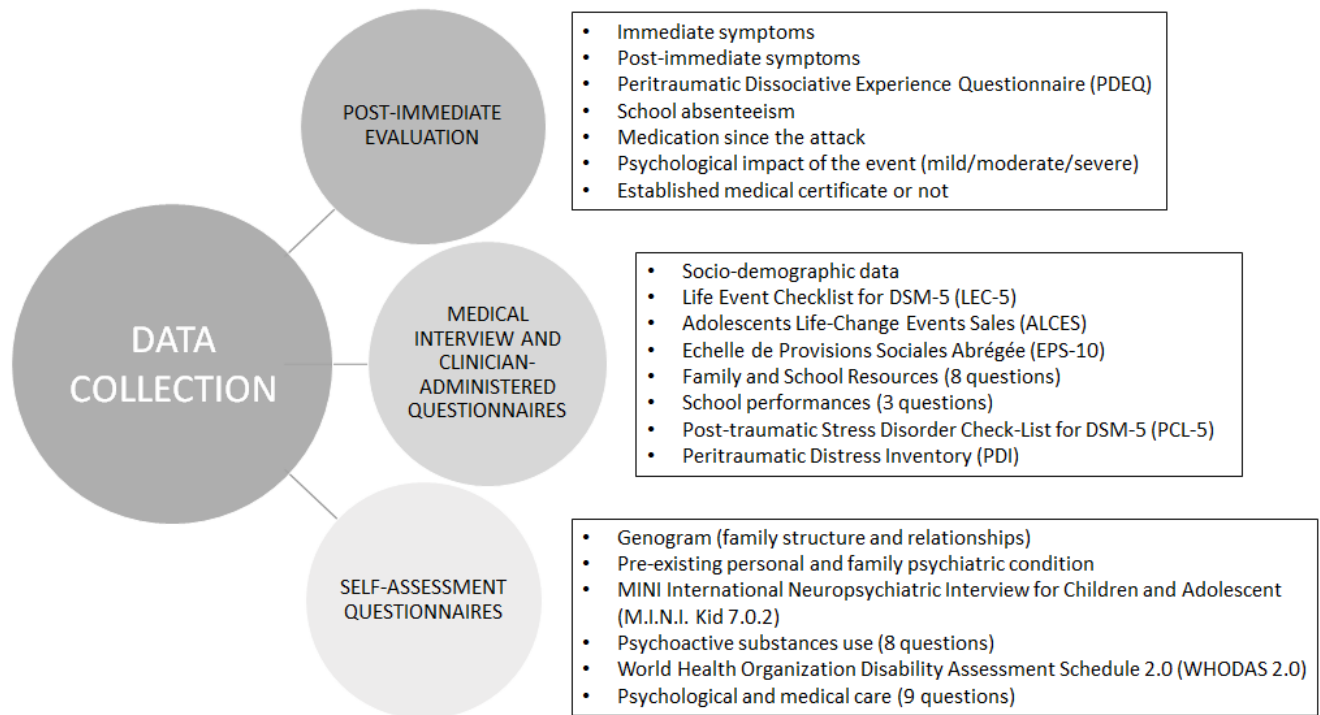

**Supplementary Figure 1.** Variables assessed in the study
